# Supplementary material
Source: HighWire-hosted journal article supplement (https://science.sciencemag.org/content/suppl/2015/04/08/348.6231.235)
Supplement: aaa3337-McCoy-SM.pdf [file aaa3337-McCoy-SM.pdf]

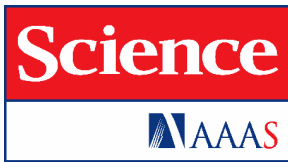

## Supplementary Materials for

### **Common variants spanning *PLK4* are associated with mitotic-origin aneuploidy in human embryos**

Rajiv C. McCoy,\* Zachary Demko,\* Allison Ryan, Milena Banjevic, Matthew Hill, Styrmir Sigurjonsson, Matthew Rabinowitz, Hunter B. Fraser, Dmitri A. Petrov\*

\*Corresponding author. E-mail: [rmccoy@stanford.edu](mailto:rmccoy@stanford.edu) (R.C.M.); [dpetrov@stanford.edu](mailto:dpetrov@stanford.edu) (D.A.P.); [zdemko@natera.com](mailto:zdemko@natera.com) (Z.D.)

Published 10 April 2015, *Science* **348**, 235 (2015)

DOI: 10.1126/science.aaa3337

#### **This PDF file includes:**

Materials and Methods  
Supplementary Text  
Figs. S1 to S5  
Table S1  
References (27–47)

#### **Other Supplementary Materials for this manuscript include the following:**

(available at [www.sciencemag.org/content/348/6231/235/suppl/DC1](http://www.sciencemag.org/content/348/6231/235/suppl/DC1))

Table S2: Aneuploidy calls for blastomeres and trophectoderm biopsies  
Table S3: Genome-wide association study summary statistics

## Materials and Methods

This research was reviewed by the Stanford University Research Compliance Office as part of the Human Research Protection Program on 10/27/2014. The research was deemed to not meet the Federal definition of human subjects research, and thus exempted from IRB review. This determination was based on the facts that 1) the work involved no intervention or interaction with study subjects, 2) researchers did not obtain or receive individually identifiable private information, and 3) the data or specimens were collected for purposes other than the current research, the identifiers for the data or specimens were replaced with a code, and the research team was prohibited from obtaining the key to the code. Natera, Inc. also received an IRB exemption for this retrospective examination of the de-identified prenatal genetic screening data in a review conducted by Ethical & Independent Review Services on 6/14/2013, who determined that the work did not constitute human subjects research.

With the exception of Figures 1 A, B and 2E, all figures were generated within the R statistical computing environment. Figure 1B was produced using *eulerAPE* (27), while Figure 2E was generated with the *qqman* (28) package. Figures 1 C, D and Figure 3 were generated with the *ggplot2* package (29).

## Sampling and Genotyping

After fertilization, single cells were biopsied from separate embryos on day 3, according to the standard protocols of each IVF clinic. Samples were then shipped overnight to the Natera laboratory for PGS. To minimize contamination, blastomeres were sequentially washed in three drops of hypotonic buffer (5.6 mg/ml KCl, 6 mg/ml bovine serum albumin). DNA was extracted with PKB (Arcturus PicoPure Lysis Buffer, 50 mM DTT) at 56°C for 1 hour and 95°C for 10 minutes before amplification using a modified Multiple Displacement Amplification (MDA) kit (GE Healthcare) at 30°C for 2.5 hours then 65°C for 15 minutes. Parental DNA samples were acquired from blood draws or MasterAmp buccal tissue swabs (Epicentre) and were extracted using the DNeasy Blood and Tissue kit (Qiagen). Parent and embryo sample DNA was then genotyped on the Illumina HumanCytoSNP-12 BeadChip. For parent samples, genotyping calls were performed using the standard Infinium II protocol ([www.illumina.com](http://www.illumina.com)) with BeadStudio software.

## Screening for Aneuploidy

Ploidy status of each chromosome of each blastomere was inferred using the Parental Support algorithm, which was previously described and extensively validated by Johnson et al. (6), who demonstrated that both false-positive and false-negative rates were not statistically different than the ‘gold standard’ method of metaphase karyotyping. Briefly, noisy genotype data from blastomeres is overcome by focusing on informative SNPs (based on parent genotypes) and combining data over large chromosomal windows. This approach also generates confidence scores which were shown to correlate with rates of false-detection (6). To improve detection accuracy, we masked all chromosome calls with confidence scores  $<80\%$ , as well as removing all blastomeres containing  $\geq 5$  low-confidence calls (779 blastomeres did not meet this quality standard). We additionally removed the 1,734 detected cases of whole-genome nullisomy, which are indistinguishable from artifacts of failed amplification.

## Discovery Phase

In preparation for association testing, we first used KING (version 1.4) (30) to select a random set of unrelated individuals (no individuals of first or second degree relatedness), thereby removing duplicate samples which were otherwise common due to patients undergoing multiple cycles of IVF. We then used PLINK (version 1.90b1g) (31) to perform a sex check, remove all SNPs with less than 95% call rate, then remove samples with less than 95% genotyping efficiency in accordance with GWAS quality control standards (32). As further quality control and to reduce the multiple-testing burden, we removed SNPs with a frequency of  $\leq 1\%$  in our sample. Final quality-filtered sample sizes for mothers and fathers used for subsequent association testing were therefore slightly different. A total of 240,990 SNPs passed quality-control filtering and were used for genome-wide association tests of aneuploidy risk.

We first distinguished sets of blastomeres with different forms of aneuploidy under the hypothesis that errors arising during maternal meiosis would have different underlying genetic architecture than those of post-zygotic mitotic origin. We did not attempt to assign all cases of aneuploidy to these alternative error classes, but instead selected subsets of aneuploid blastomeres that could be assigned to one or the other with high confidence.

In the case of maternal meiotic error, we designated as cases all maternal trisomies where homologs from both maternal grandparents were observed at any chromosomal position in the blastomere (Fig. 1A). Such aneuploidies should be unambiguously meiotic in origin, as post-zygotic errors in the absence of meiotic errors cannot produce this outcome (33). Most maternal meiotic errors are thought to arise via non-disjunction, the failure of homologous chromosomes or sister chromatids to separate, resulting in maternal chromosome loss in one daughter cell and corresponding maternal chromosome gain in the other daughter cell (1). Because errors of meiotic origin increase with maternal age, we included age as a covariate in this association test.

Because zygotic genome activation does not occur until the 4–8 cell stage (7), we hypothesized that variation in maternal gene products deposited in oocytes could help explain variation in mitotic origin aneuploidy in day 3 blastomeres. However, it is conceivable that paternal genotype could also affect aneuploidy risk, as the centrosome, the microtubule organizing center that controls cell division, is inherited via the sperm (34). Post-zygotic errors in mitosis are expected to affect maternal and paternal chromosomes approximately equally. However, as previous studies have demonstrated that errors in male meiosis are rare ( $\leq 5\%$  abnormal sperm (8)), we conservatively identified a set of blastomeres with putative mitotic error as those with any aneuploidy affecting the paternal copy of any chromosome. This set of aneuploidies includes paternal monosomy, paternal trisomy, and paternal uniparental disomy, even when these errors co-occur with other forms of aneuploidy. A large proportion of post-zygotic errors are thought to arise via a mechanism termed anaphase lag, which refers to the delayed movement of a chromatid toward the spindle pole (9). This can result in chromosome loss in one daughter cell without a corresponding chromosome gain in the other daughter cell (35). Anaphase lag can occur when microtubules emanating from multiple spindle poles attach to a single kinetochore (11). Such ‘merotelic’ attachments are more common in the presence of extra centrosomes and other centrosome abnormalities. Supporting the accuracy of our classification scheme, no association was observed between the incidence of putative mitotic origin aneuploidies and maternal age.

For both the maternal meiotic and post-zygotic error classes, we defined the response variable by assigning all blastomeres in that aneuploid set as cases and all other blastomeres as controls for each IVF

cycle. We repeated this classification for all 2,362 unrelated mothers in the data set. These case-control data were then fit in MATLAB (version 7.12.0) using a generalized linear model assuming a binomial error distribution with a logit link function. Upon observing evidence of over-dispersion, we refit the model without fixing the dispersion parameter at 1 (i.e., quasi-binomial). To test for any additional peaks masked by the strongest peak, we refit the model while including genotype at rs2305957 (again encoded as the number of alternative alleles at this locus) as a linear covariate. No additional variants achieved genome-wide significance in this second-order analysis.

As mild genomic inflation was observed for the mitotic error association test ( $\lambda = 1.059$ ), we adjusted all  $P$ -values using the genomic control approach (36), resulting in a corrected  $P$ -value of  $5.99 \times 10^{-15}$  for rs2305957 (the most significant genotyped SNP). This approach corrects for inflated  $P$ -values on the basis of the distribution of test statistics obtained from putative unassociated loci (36).

In order to estimate the effect size of genotype on overall aneuploidy in units of maternal age, we fit a line to the plot of proportion of aneuploid blastomeres versus maternal age, for maternal age  $\geq 35$  years (Fig. S5), weighting the regression by the square root of the total samples per age category to account for measurement error. We then compared the slope of this line to the difference in the proportion of aneuploid embryos between the two homozygous maternal genotype classes at SNP rs2305957.

## Robustness and Statistical Validation

To exclude population stratification as a possible source of spurious association (and potentially identify population-specific associations), we used principal components analysis to infer ancestry of patients in our sample. We first extracted the set of overlapping SNPs between the 11 HapMap population samples and our sample genotypes. We re-encoded genotypes as 0, 1, or 2 to reflect the number of alternative alleles carried by each individual at each SNP. We randomly downsampled the data to 20,000 SNPs, then performed PCA on the HapMap populations to define the principal component axes. For each patient in our sample, we then calculated principal component scores on these predefined axes. We grouped patients that fell within the ranges of European or East Asian reference samples on the first three principal components, performing the previous association test on these subsamples of 1,332 and

259 patients, respectively. We additionally repeated the test while using the top 10 principle components of the genotype matrix as linear covariates, finding that this did not affect the mitotic error association.

For the validation step, which was performed using data as of March 2014, we selected all new cases since the initial database pull in September 2013, compiling both the genotype data and generating embryonic aneuploidy data using the Parental Support algorithm (6). We then combined the genotype data of this new set with the genotype data of the unrelated individuals used in the discovery stage, again using KING (30) to extract a new set of unrelated individuals. The new cases ( $N_{patients} = 34$ ,  $N_{embryos} = 283$ ) were then selected from this set to ensure that duplicate or related individuals were not present across or within the discovery and validation samples.

We used a generalized linear model to test for differences in the number of embryos contributed for trophoctoderm biopsy screening by mothers with different genotypes at the associated locus. We encoded genotype as the number of alternative alleles at the SNP rs2305957, thereby testing for an additive effect. As maternal age is also associated with the number of tested trophoctoderm biopsies, we controlled for this effect by including a second-order polynomial effect of maternal age, such that the model had the form:  $Y = \beta_0 + \beta_1(Age) + \beta_2(Age)^2 + \beta_3(Alt. \text{ allele count})$ . The model assumed a Poisson error distribution, modelling overdispersion by not fixing the dispersion parameter (i.e., quasi-Poisson). We note that sampling criteria were not standardized across clinics, which likely adds noise to our test, but should not bias the results.

## Annotation

As initial genotyping was performed using the  $\sim 300K$  SNP Illumina Cyto-12 chip, genotypes were relatively sparsely distributed throughout the genome. We therefore refined the association signal by performing genotype imputation. We first selected the 1,332 unrelated individuals falling within the range of the first three principal components of HapMap samples from populations of European ancestry. Using BEAGLE (version 4.r1230) (37), we imputed untyped markers based on a European reference panel from the 1,000 Genomes Project (14). We then repeated the association tests as before, but using both genotyped (square plotting symbols in Fig. 2E) and imputed sample genotypes (circular plotting

symbols in Fig. 2E), thereby allowing us to define the extent of the associated haplotype.

We used the program SNAP (38) to identify variants in strong linkage disequilibrium with the most significant genotyped SNP (rs2305957), then retrieved functional annotations for this list of SNPs using SNPnexus (39). SNP effect predictions were performed using SIFT (40) and PolyPhen2 (41), but we note that these approaches have known biases against SNPs for which the reference genome carries the derived allele (42).

To better understand the evolutionary history of the associated locus, we evaluated the allelic state of rs2305957 and the two coding SNPs in *PLK4* (rs3811740 and rs17012739) in chimpanzee and ancient hominin genomes aligned to the human reference genome. In each case, Neanderthal (23, 43, 44) and Denisovan (45) individuals carried the ancestral (i.e. shared with chimpanzee) allele at the corresponding orthologous positions.

## Supplementary Text

### Associations with Alternative Phenotypes

By initially limiting the phenotype to blastomeres with aneuploidies affecting paternal chromosomes, we identified a subset of aneuploidies that are very likely to have been generated during post-zygotic cell divisions. As previously mentioned, however, errors affecting paternal chromosomes commonly co-occur with other forms of aneuploidy, especially in the case of paternal chromosome loss. We were therefore interested in whether other phenotypes characteristic of post-zygotic errors, namely complex aneuploidies involving chromosome losses, were also associated with the same genotype. Upon testing for association with alternative phenotypes (Table S1), we found that the initial association was driven by aneuploidies that include a paternal chromosome loss ( $\beta = 0.237$ ,  $SE = 0.0285$ ,  $P = 6.76 \times 10^{-17}$ ), but not those including paternal chromosome gains upon excluding co-occurring cases of chromosome loss ( $\beta = 0.0198$ ,  $SE = 0.0639$ ,  $P = 0.757$ ). Because mitotic errors are equally likely to affect maternal chromosomes, we hypothesized that the association might also be observed for these aneuploidies despite the additional noise due to the prevalence of maternal meiotic error. As the initial association

was predominantly driven by chromosome losses, we restricted the phenotype to maternal chromosome loss. Testing for an association of the rs2305957 genotype with maternal chromosome loss for 19,576 blastomeres, after removing all blastomeres with at least one paternal chromosome loss (rather than including these as controls), showed a significant association in the same direction as the initial association ( $\beta = 0.0783$ ,  $SE = 0.0314$ ,  $P = 0.0128$ ), providing validation of the association result.



**Figure S1:** Manhattan and QQ plots depicting P-values of association tests of each genotyped SNP versus the rate of aneuploidy resulting in putative maternal meiotic error (trisomies where both maternal parental homologs were determined to be present at a given genomic position). P-values are corrected using the genomic control method (46). Results for association with maternal genotype are given in panels **A-B**, while results for association with paternal genotype (a control set with approximately the same ethnic composition as the set of female patients) are given in panels **C-D**. For the Manhattan plots (**A & C**), the red lines represent a standard genome-wide cut-off of  $5 \times 10^{-8}$ , while the grey dotted lines represent a less stringent P-value of  $1 \times 10^{-6}$ . The QQ plots (**B & D**) depict the distributions of P-values observed versus those expected under the null. The grey shaded regions indicate probability bounds.

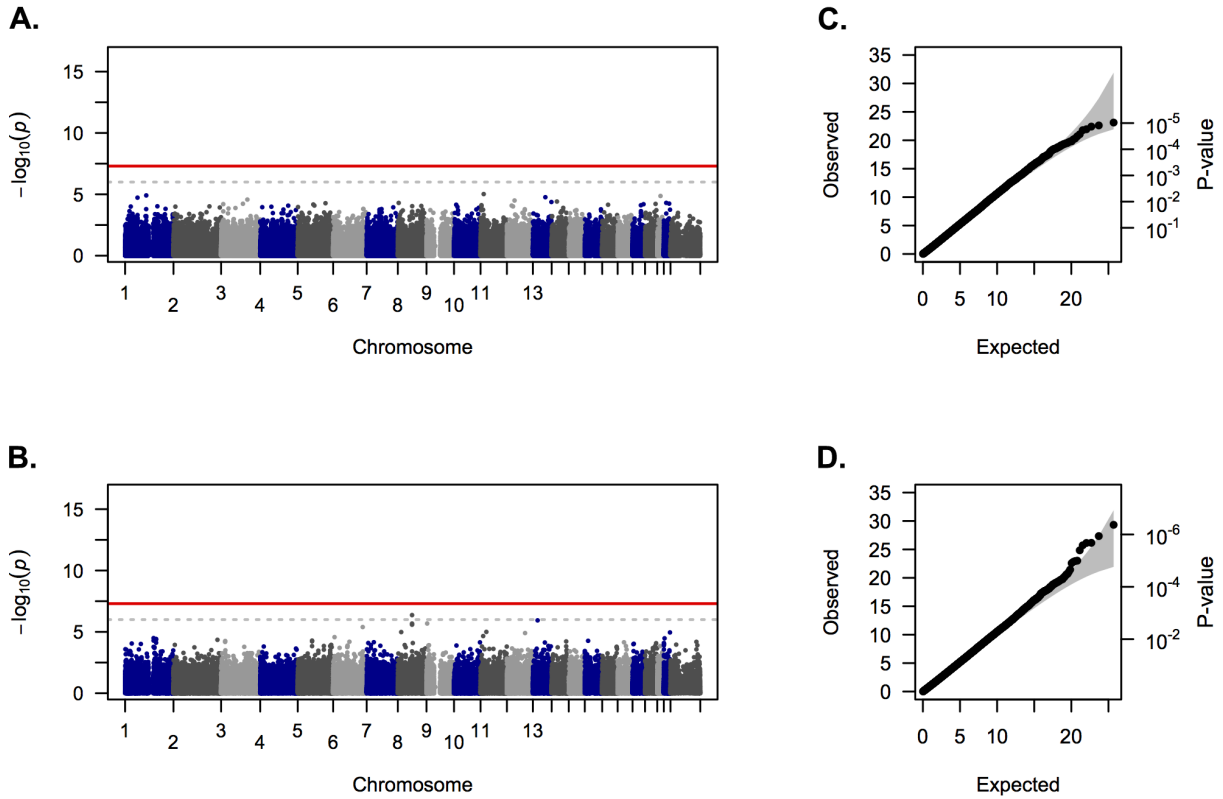

**Figure S2:** Frequency of alleles at SNP rs2305957 among 1000 Genomes Phase 3 populations. This figure was generated using the Geography of Genetic Variants Browser v0.2 (<http://www.popgen.uchicago.edu/ggv>).

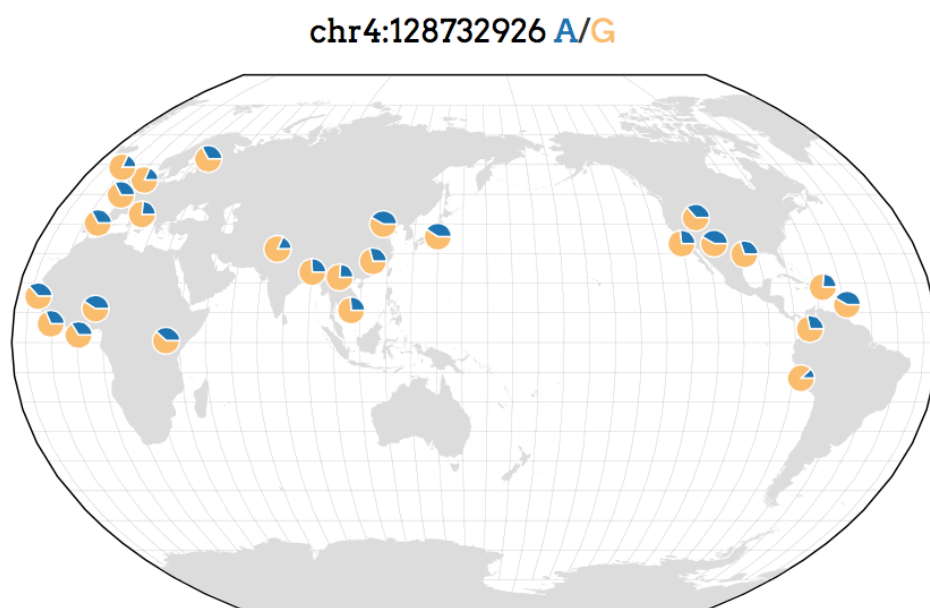

**Figure S3:** The first two principal components of the genotype matrix of all unrelated mothers in the sample. Principal components were first defined using the entire HapMap dataset of eleven worldwide populations (47), then client principal component scores were computed according to these predefined axes. The red and green sets of points represent mothers of East Asian and European ancestry, respectively. The ranges used to define these subsamples were based on the CHB, CHD, and JPT HapMap reference populations in the case of the East Asian set, and the CEU and TSI HapMap populations in the case of the European set. These ancestry-specific subsamples were used to correct for potential population structure (Table 1, lower panel).

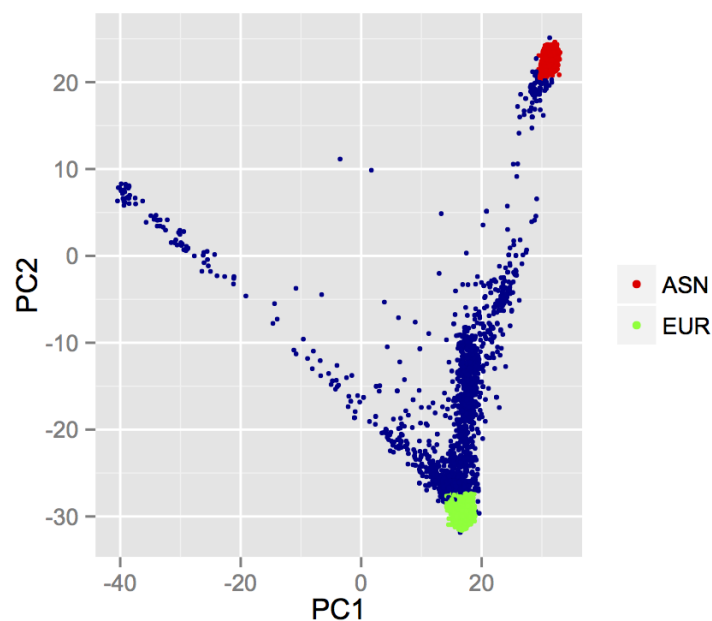

**Figure S4:** Logistic regression coefficient estimates ( $\beta$ ) for association of SNP genotype at rs2305957 with aneuploidy affecting any paternal chromosome copy (paternal monosomy, paternal trisomy, or paternal uniparental disomy). Cases were stratified by total number of aneuploid chromosomes (all other blastomeres are considered as controls). This demonstrates that the previously reported association is mostly driven by complex aneuploidies affecting  $\geq 4$  chromosomes.

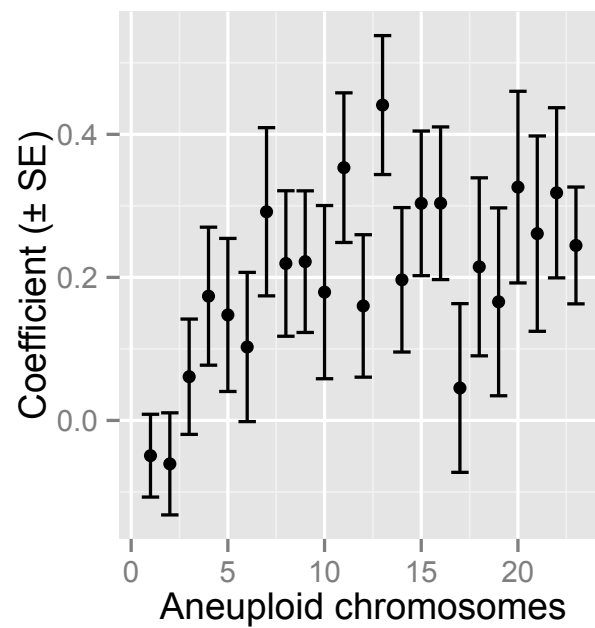

**Figure S5:** The proportion of aneuploid blastomeres, stratified by maternal age. Beginning at age 35, the proportion of aneuploid blastomeres increases approximately linearly, with a 3.4% increase in the rate of aneuploidy per year. The difference in rates of aneuploidy between the two respective homozygous genotype classes at rs2305957 is therefore equivalent to the average effect of ~1.8 years of age during this timespan. Error bars indicate standard errors of the proportions.

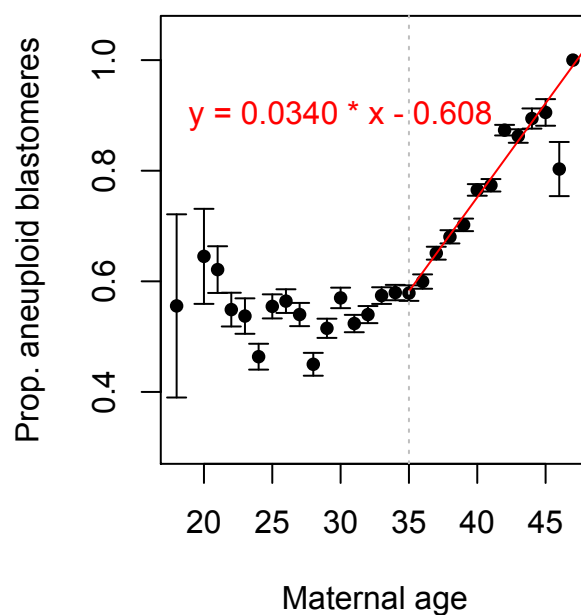

**Table S1:** Association of SNP rs2305957 with alternative aneuploid phenotypes. The SNP was originally identified via its association with aneuploidies affecting paternal chromosome copies (Table 1). By testing association with different classes of aneuploidy, we refine the source of the signal, which is primarily driven by complex aneuploidies with co-occurring maternal and paternal chromosome losses as well as nullisomies. Blastomeres meeting the exclusion criteria were not treated as cases or controls, but masked from the dataset. For aneuploid classes that include errors of meiotic origin, we included a quadratic term to control for the effect of maternal age.

| Phenotype                                                                           | Model                                                                                                                    | $\beta$ | SE     | OR (95% CI)         | P                      |
|-------------------------------------------------------------------------------------|--------------------------------------------------------------------------------------------------------------------------|---------|--------|---------------------|------------------------|
| Any aneuploidy                                                                      | $\text{logit}(Y) = \beta_0 + \beta_1(\text{Age}) + \beta_2(\text{Age})^2 + \beta_3(\text{Alt. allele count}) + \epsilon$ | 0.139   | 0.0271 | 1.149 (1.090–1.212) | $3.05 \times 10^{-7}$  |
| Minor aneuploidy (1–2 chroms. affected)<br>exclude $\geq 3$ chromosomes affected    | $\text{logit}(Y) = \beta_0 + \beta_1(\text{Age}) + \beta_2(\text{Age})^2 + \beta_3(\text{Alt. allele count}) + \epsilon$ | 0.0431  | 0.0303 | 1.044 (0.984–1.108) | 0.154                  |
| Complex aneuploidy ( $\geq 3$ chroms. affected)<br>exclude 1–2 chromosomes affected | $\text{logit}(Y) = \beta_0 + \beta_1(\text{Age}) + \beta_2(\text{Age})^2 + \beta_3(\text{Alt. allele count}) + \epsilon$ | 0.234   | 0.0329 | 1.263 (1.184–1.347) | $1.72 \times 10^{-12}$ |
| Paternal chromosome gain                                                            | $\text{logit}(Y) = \beta_0 + \beta_1(\text{Alt. allele count}) + \epsilon$                                               | 0.0946  | 0.0398 | 1.099 (1.017–1.188) | 0.0176                 |
| Paternal chromosome gain<br>exclude chromosome loss                                 | $\text{logit}(Y) = \beta_0 + \beta_1(\text{Alt. allele count}) + \epsilon$                                               | 0.0198  | 0.0639 | 1.020 (0.900–1.156) | 0.757                  |
| Maternal chromosome gain                                                            | $\text{logit}(Y) = \beta_0 + \beta_1(\text{Age}) + \beta_2(\text{Age})^2 + \beta_3(\text{Alt. allele count}) + \epsilon$ | 0.0271  | 0.0306 | 1.027 (0.968–1.091) | 0.375                  |
| Paternal chromosome loss                                                            | $\text{logit}(Y) = \beta_0 + \beta_1(\text{Alt. allele count}) + \epsilon$                                               | 0.237   | 0.0285 | 1.267 (1.199–1.340) | $6.76 \times 10^{-17}$ |
| Paternal chromosome loss;<br>exclude maternal chromosome loss                       | $\text{logit}(Y) = \beta_0 + \beta_1(\text{Alt. allele count}) + \epsilon$                                               | 0.195   | 0.0414 | 1.215 (1.120–1.317) | $2.69 \times 10^{-6}$  |
| Maternal chromosome loss                                                            | $\text{logit}(Y) = \beta_0 + \beta_1(\text{Age}) + \beta_2(\text{Age})^2 + \beta_3(\text{Alt. allele count}) + \epsilon$ | 0.141   | 0.0261 | 1.152 (1.094–1.212) | $6.71 \times 10^{-8}$  |
| Maternal chromosome loss;<br>exclude paternal chromosome loss                       | $\text{logit}(Y) = \beta_0 + \beta_1(\text{Age}) + \beta_2(\text{Age})^2 + \beta_3(\text{Alt. allele count}) + \epsilon$ | 0.0783  | 0.0314 | 1.081 (1.017–1.150) | 0.0128                 |
| Nullisomy                                                                           | $\text{logit}(Y) = \beta_0 + \beta_1(\text{Age}) + \beta_2(\text{Age})^2 + \beta_3(\text{Alt. allele count}) + \epsilon$ | 0.269   | 0.0374 | 1.309 (1.216–1.408) | $8.42 \times 10^{-13}$ |
| Nullisomy; exclude monosomies                                                       | $\text{logit}(Y) = \beta_0 + \beta_1(\text{Age}) + \beta_2(\text{Age})^2 + \beta_3(\text{Alt. allele count}) + \epsilon$ | 0.00757 | 0.101  | 1.008 (0.826–1.229) | 0.940                  |
| Paternal & maternal chromosome loss                                                 | $\text{logit}(Y) = \beta_0 + \beta_1(\text{Age}) + \beta_2(\text{Age})^2 + \beta_3(\text{Alt. allele count}) + \epsilon$ | 0.258   | 0.0357 | 1.294 (1.207–1.388) | $7.36 \times 10^{-13}$ |
| Nullisomy & paternal chromosome loss<br>& maternal chromosome loss                  | $\text{logit}(Y) = \beta_0 + \beta_1(\text{Age}) + \beta_2(\text{Age})^2 + \beta_3(\text{Alt. allele count}) + \epsilon$ | 0.312   | 0.0417 | 1.366 (1.259–1.483) | $1.06 \times 10^{-13}$ |

## REFERENCES AND NOTES

1. T. Hassold, P. Hunt, To err (meiotically) is human: The genesis of human aneuploidy. *Nat. Rev. Genet.* **2**, 280–291 (2001). [Medline doi:10.1038/35066065](#)
2. L. Voullaire, H. Slater, R. Williamson, L. Wilton, Chromosome analysis of blastomeres from human embryos by using comparative genomic hybridization. *Hum. Genet.* **106**, 210–217 (2000). [Medline doi:10.1007/s004390051030](#)
3. D. Wells, J. D. Delhanty, Comprehensive chromosomal analysis of human preimplantation embryos using whole genome amplification and single cell comparative genomic hybridization. *Mol. Hum. Reprod.* **6**, 1055–1062 (2000). [Medline doi:10.1093/molehr/6.11.1055](#)
4. J. D. Delhanty, J. C. Harper, A. Ao, A. H. Handyside, R. M. Winston, Multicolour FISH detects frequent chromosomal mosaicism and chaotic division in normal preimplantation embryos from fertile patients. *Hum. Genet.* **99**, 755–760 (1997). [Medline doi:10.1007/s004390050443](#)
5. Materials and methods are available as supplementary materials on *Science Online*.
6. D. S. Johnson, G. Gemelos, J. Baner, A. Ryan, C. Cinnioglu, M. Banjevic, R. Ross, M. Alper, B. Barrett, J. Frederick, D. Potter, B. Behr, M. Rabinowitz, Preclinical validation of a microarray method for full molecular karyotyping of blastomeres in a 24-h protocol. *Hum. Reprod.* **25**, 1066–1075 (2010). [Medline doi:10.1093/humrep/dep452](#)
7. W. Tadros, H. D. Lipshitz, The maternal-to-zygotic transition: A play in two acts. *Development* **136**, 3033–3042 (2009). [Medline doi:10.1242/dev.033183](#)
8. C. Templado, F. Vidal, A. Estop, Aneuploidy in human spermatozoa. *Cytogenet. Genome Res.* **133**, 91–99 (2011). [Medline doi:10.1159/000323795](#)
9. E. Coonen, J. G. Derhaag, J. C. Dumoulin, L. C. van Wissen, M. Bras, M. Janssen, J. L. Evers, J. P. Geraedts, Anaphase lagging mainly explains chromosomal mosaicism in human preimplantation embryos. *Hum. Reprod.* **19**, 316–324 (2004). [Medline doi:10.1093/humrep/deh077](#)
10. D. D. Daphnis, J. D. Delhanty, S. Jerkovic, J. Geyer, I. Craft, J. C. Harper, Detailed FISH analysis of day 5 human embryos reveals the mechanisms leading to mosaic aneuploidy. *Hum. Reprod.* **20**, 129–137 (2005). [Medline doi:10.1093/humrep/deh554](#)
11. J. Gegan, S. Polakova, L. Zhang, I. M. Tolić-Nørrelykke, D. Cimini, Merotelic kinetochore attachment: Causes and effects. *Trends Cell Biol.* **21**, 374–381 (2011). [Medline doi:10.1016/j.tcb.2011.01.003](#)
12. N. J. Ganem, S. A. Godinho, D. Pellman, A mechanism linking extra centrosomes to chromosomal instability. *Nature* **460**, 278–282 (2009). [Medline doi:10.1038/nature08136](#)

13. A. J. Holland, D. W. Cleveland, Boveri revisited: Chromosomal instability, aneuploidy and tumorigenesis. *Nat. Rev. Mol. Cell Biol.* **10**, 478–487 (2009). [Medline doi:10.1038/nrm2718](#)
14. G. R. Abecasis, D. Altshuler, A. Auton, L. D. Brooks, R. M. Durbin, R. A. Gibbs, M. E. Hurles, G. A. McVean; 1000 Genomes Project Consortium, A map of human genome variation from population-scale sequencing. *Nature* **467**, 1061–1073 (2010). [Medline](#)
15. M. Vega, A. Breborowicz, E. L. Moshier, P. G. McGovern, M. D. Keltz, Blastulation rates decline in a linear fashion from euploid to aneuploid embryos with single versus multiple chromosomal errors. *Fertil. Steril.* **102**, 394–398 (2014). [Medline doi:10.1016/j.fertnstert.2014.04.026](#)
16. R. Habedanck, Y.-D. Stierhof, C. J. Wilkinson, E. A. Nigg, The Polo kinase *Plk4* functions in centriole duplication. *Nat. Cell Biol.* **7**, 1140–1146 (2005). [Medline doi:10.1038/ncb1320](#)
17. M. Bettencourt-Dias, A. Rodrigues-Martins, L. Carpenter, M. Riparbelli, L. Lehmann, M. K. Gatt, N. Carmo, F. Balloux, G. Callaini, D. M. Glover, SAK/PLK4 is required for centriole duplication and flagella development. *Curr. Biol.* **15**, 2199–2207 (2005). [Medline doi:10.1016/j.cub.2005.11.042](#)
18. P. A. Coelho, L. Bury, B. Sharif, M. G. Riparbelli, J. Fu, G. Callaini, D. M. Glover, M. Zernicka-Goetz, Spindle formation in the mouse embryo requires *Plk4* in the absence of centrioles. *Dev. Cell* **27**, 586–597 (2013). [Medline doi:10.1016/j.devcel.2013.09.029](#)
19. E. N. Firat-Karalar, T. Stearns, The centriole duplication cycle. *Philos. Trans. R. Soc. London Ser. B* **369**, 20130460 (2014). [Medline doi:10.1098/rstb.2013.0460](#)
20. M. A. Ko, C. O. Rosario, J. W. Hudson, S. Kulkarni, A. Pollett, J. W. Dennis, C. J. Swallow, Plk4 haploinsufficiency causes mitotic infidelity and carcinogenesis. *Nat. Genet.* **37**, 883–888 (2005). [Medline doi:10.1038/ng1605](#)
21. C. O. Rosario, M. A. Ko, Y. Z. Haffani, R. A. Gladdy, J. Paderova, A. Pollett, J. A. Squire, J. W. Dennis, C. J. Swallow, Plk4 is required for cytokinesis and maintenance of chromosomal stability. *Proc. Natl. Acad. Sci. U.S.A.* **107**, 6888–6893 (2010). [Medline doi:10.1073/pnas.0910941107](#)
22. J. E. Sillibourne, M. Bornens, Polo-like kinase 4: The odd one out of the family. *Cell Div.* **5**, 25 (2010). [Medline doi:10.1186/1747-1028-5-25](#)
23. R. E. Green, J. Krause, A. W. Briggs, T. Maricic, U. Stenzel, M. Kircher, N. Patterson, H. Li, W. Zhai, M. H. Fritz, N. F. Hansen, E. Y. Durand, A. S. Malaspina, J. D. Jensen, T. Marques-Bonet, C. Alkan, K. Prüfer, M. Meyer, H. A. Burbano, J. M. Good, R. Schultz, A. Aximu-Petri, A. Butthof, B. Höber, B. Höffner, M. Siegemund, A. Weihmann, C. Nusbaum, E. S. Lander, C. Russ, N. Novod, J. Affourtit, M. Egholm, C. Verna, P. Rudan, D. Brajkovic, Z. Kucan, I. Gusic, V. B. Doronichev, L. V. Golovanova, C. Lalueza-Fox, M. de la Rasilla, J. Fortea, A. Rosas, R. W. Schmitz, P. L. Johnson, E. E. Eichler, D. Falush, E. Birney, J. C. Mullikin, M. Slatkin, R. Nielsen, J. Kelso, M. Lachmann, D. Reich,



- S. Pääbo, A draft sequence of the Neandertal genome. *Science* **328**, 710–722 (2010). [Medline doi:10.1126/science.1188021](#)
24. R. D. Alexander, K. M. Noonan, in *Evolutionary Biology and Human Social Organization*, N. A. Chagnon, W. G. Irons, Eds. (Duxbury Press, North Scituate, MA, 1979), pp. 436–453.
  25. R. T. Scott Jr., K. M. Upham, E. J. Forman, K. H. Hong, K. L. Scott, D. Taylor, X. Tao, N. R. Treff, Blastocyst biopsy with comprehensive chromosome screening and fresh embryo transfer significantly increases in vitro fertilization implantation and delivery rates: A randomized controlled trial. *Fertil. Steril.* **100**, 697–703 (2013). [Medline doi:10.1016/j.fertnstert.2013.04.035](#)
  26. A. J. Wilcox, C. R. Weinberg, J. F. O'Connor, D. D. Baird, J. P. Schlatterer, R. E. Canfield, E. G. Armstrong, B. C. Nisula, Incidence of early loss of pregnancy. *N. Engl. J. Med.* **319**, 189–194 (1988). [Medline doi:10.1056/NEJM198807283190401](#)
  27. L. Micallef, P. Rodgers, eulerAPE: Drawing area-proportional 3-Venn diagrams using ellipses. *PLOS ONE* **9**, e101717 (2014). [Medline doi:10.1371/journal.pone.0101717](#)
  28. S. D. Turner, qqman: an R package for visualizing GWAS results using Q-Q and manhattan plots. *bioRxiv*, available at <http://biorxiv.org/content/early/2014/05/14/005165>.
  29. H. Wickham, *ggplot2: Elegant Graphics for Data Analysis* (Springer, New York, 2009).
  30. A. Manichaikul, J. C. Mychaleckyj, S. S. Rich, K. Daly, M. Sale, W. M. Chen, Robust relationship inference in genome-wide association studies. *Bioinformatics* **26**, 2867–2873 (2010). [Medline doi:10.1093/bioinformatics/btq559](#)
  31. S. Purcell, B. Neale, K. Todd-Brown, L. Thomas, M. A. Ferreira, D. Bender, J. Maller, P. Sklar, P. I. de Bakker, M. J. Daly, P. C. Sham, PLINK: A tool set for whole-genome association and population-based linkage analyses. *Am. J. Hum. Genet.* **81**, 559–575 (2007). [Medline doi:10.1086/519795](#)
  32. S. Turner, L. L. Armstrong, Y. Bradford, C. S. Carlson, D. C. Crawford, A. T. Crenshaw, M. de Andrade, K. F. Doheny, J. L. Haines, G. Hayes, G. Jarvik, L. Jiang, I. J. Kullo, R. Li, H. Ling, T. A. Manolio, M. Matsumoto, C. A. McCarty, A. N. McDavid, D. B. Mirel, J. E. Paschall, E. W. Pugh, L. V. Rasmussen, R. A. Wilke, R. L. Zuvich, M. D. Ritchie, Quality control procedures for genome-wide association studies. *Curr. Protoc. Hum. Genet.* **68**, 1–19 (2011). [Medline doi:10.1016/j.fertnstert.2011.11.034](#)
  33. M. Rabinowitz, A. Ryan, G. Gemelos, M. Hill, J. Baner, C. Cinnioglu, M. Banjevic, D. Potter, D. A. Petrov, Z. Demko, Origins and rates of aneuploidy in human blastomeres. *Fertil. Steril.* **97**, 395–401 (2012). [Medline doi:10.1016/j.fertnstert.2011.11.034](#)
  34. C. Simerly, G. J. Wu, S. Zoran, T. Ord, R. Rawlins, J. Jones, C. Navara, M. Gerrity, J. Rinehart, Z. Binor, R. Asch, G. Schatten, The paternal inheritance of the centrosome, the cell's microtubule-organizing center, in humans, and the

- implications for infertility. *Nat. Med.* **1**, 47–52 (1995). [Medline doi:10.1038/nm0195-47](#)
35. E. Mantikou, K. M. Wong, S. Repping, S. Mastenbroek, Molecular origin of mitotic aneuploidies in preimplantation embryos. *Biochim. Biophys. Acta* **1822**, 1921–1930 (2012). [Medline doi:10.1016/j.bbadis.2012.06.013](#)
  36. B. Devlin, K. Roeder, Genomic control for association studies. *Biometrics* **55**, 997–1004 (1999). [Medline doi:10.1111/j.0006-341X.1999.00997.x](#)
  37. B. N. Howie, P. Donnelly, J. Marchini, A flexible and accurate genotype imputation method for the next generation of genome-wide association studies. *PLOS Genet.* **5**, e1000529 (2009). [Medline doi:10.1371/journal.pgen.1000529](#)
  38. A. D. Johnson, R. E. Handsaker, S. L. Pulit, M. M. Nizzari, C. J. O'Donnell, P. I. de Bakker, SNAP: A web-based tool for identification and annotation of proxy SNPs using HapMap. *Bioinformatics* **24**, 2938–2939 (2008). [Medline doi:10.1093/bioinformatics/btn564](#)
  39. C. Chelala, A. Khan, N. R. Lemoine, SNPnexus: A web database for functional annotation of newly discovered and public domain single nucleotide polymorphisms. *Bioinformatics* **25**, 655–661 (2009). [Medline doi:10.1093/bioinformatics/btn653](#)
  40. P. Kumar, S. Henikoff, P. C. Ng, Predicting the effects of coding non-synonymous variants on protein function using the SIFT algorithm. *Nat. Protoc.* **4**, 1073–1081 (2009). [Medline doi:10.1038/nprot.2009.86](#)
  41. I. A. Adzhubei, S. Schmidt, L. Peshkin, V. E. Ramensky, A. Gerasimova, P. Bork, A. S. Kondrashov, S. R. Sunyaev, A method and server for predicting damaging missense mutations. *Nat. Methods* **7**, 248–249 (2010). [Medline doi:10.1038/nmeth0410-248](#)
  42. Y. B. Simons, M. C. Turchin, J. K. Pritchard, G. Sella, The deleterious mutation load is insensitive to recent population history. *Nat. Genet.* **46**, 220–224 (2014). [Medline doi:10.1038/ng.2896](#)
  43. S. Castellano, G. Parra, F. A. Sánchez-Quinto, F. Racimo, M. Kuhlwilm, M. Kircher, S. Sawyer, Q. Fu, A. Heinze, B. Nickel, J. Dabney, M. Siebauer, L. White, H. A. Burbano, G. Renaud, U. Stenzel, C. Lalueza-Fox, M. de la Rasilla, A. Rosas, P. Rudan, D. Brajković, Ž. Kucan, I. Gušić, M. V. Shunkov, A. P. Derevianko, B. Viola, M. Meyer, J. Kelso, A. M. Andrés, S. Pääbo, Patterns of coding variation in the complete exomes of three Neandertals. *Proc. Natl. Acad. Sci. U.S.A.* **111**, 6666–6671 (2014). [Medline doi:10.1073/pnas.1405138111](#)
  44. K. Prüfer, F. Racimo, N. Patterson, F. Jay, S. Sankararaman, S. Sawyer, A. Heinze, G. Renaud, P. H. Sudmant, C. de Filippo, H. Li, S. Mallick, M. Dannemann, Q. Fu, M. Kircher, M. Kuhlwilm, M. Lachmann, M. Meyer, M. Ongyerth, M. Siebauer, C. Theunert, A. Tandon, P. Moorjani, J. Pickrell, J. C. Mullikin, S. H. Vohr, R. E. Green, I. Hellmann, P. L. Johnson, H. Blanche, H. Cann, J. O. Kitzman, J. Shendure, E. E. Eichler, E. S. Lein, T. E. Bakken, L. V. Golovanova, V. B. Doronichev, M. V. Shunkov, A. P. Derevianko, B. Viola, M. Slatkin, D.

- Reich, J. Kelso, S. Pääbo, The complete genome sequence of a Neanderthal from the Altai Mountains. *Nature* **505**, 43–49 (2014). [Medline](#)
45. M. Meyer, M. Kircher, M. T. Gansauge, H. Li, F. Racimo, S. Mallick, J. G. Schraiber, F. Jay, K. Prüfer, C. de Filippo, P. H. Sudmant, C. Alkan, Q. Fu, R. Do, N. Rohland, A. Tandon, M. Siebauer, R. E. Green, K. Bryc, A. W. Briggs, U. Stenzel, J. Dabney, J. Shendure, J. Kitzman, M. F. Hammer, M. V. Shunkov, A. P. Derevianko, N. Patterson, A. M. Andrés, E. E. Eichler, M. Slatkin, D. Reich, J. Kelso, S. Pääbo, A high-coverage genome sequence from an archaic Denisovan individual. *Science* **338**, 222–226 (2012). [Medline](#)
  46. B. Devlin, K. Roeder, L. Wasserman, Genomic control, a new approach to genetic-based association studies. *Theor. Popul. Biol.* **60**, 155–166 (2001). [Medline](#) [doi:10.1006/tpbi.2001.1542](https://doi.org/10.1006/tpbi.2001.1542)
  47. D. M. Altshuler, R. A. Gibbs, L. Peltonen, D. M. Altshuler, R. A. Gibbs, L. Peltonen, E. Dermitzakis, S. F. Schaffner, F. Yu, L. Peltonen, E. Dermitzakis, P. E. Bonnen, D. M. Altshuler, R. A. Gibbs, P. I. de Bakker, P. Deloukas, S. B. Gabriel, R. Gwilliam, S. Hunt, M. Inouye, X. Jia, A. Palotie, M. Parkin, P. Whittaker, F. Yu, K. Chang, A. Hawes, L. R. Lewis, Y. Ren, D. Wheeler, R. A. Gibbs, D. M. Muzny, C. Barnes, K. Darvishi, M. Hurles, J. M. Korn, K. Kristiansson, C. Lee, S. A. McCarroll, J. Nemesh, E. Dermitzakis, A. Keinan, S. B. Montgomery, S. Pollack, A. L. Price, N. Soranzo, P. E. Bonnen, R. A. Gibbs, C. Gonzaga-Jauregui, A. Keinan, A. L. Price, F. Yu, V. Anttila, W. Brodeur, M. J. Daly, S. Leslie, G. McVean, L. Moutsianas, H. Nguyen, S. F. Schaffner, Q. Zhang, M. J. Gori, R. McGinnis, W. McLaren, S. Pollack, A. L. Price, S. F. Schaffner, F. Takeuchi, S. R. Grossman, I. Shlyakhter, E. B. Hostetter, P. C. Sabeti, C. A. Adebamowo, M. W. Foster, D. R. Gordon, J. Licinio, M. C. Manca, P. A. Marshall, I. Matsuda, D. Ngare, V. O. Wang, D. Reddy, C. N. Rotimi, C. D. Royal, R. R. Sharp, C. Zeng, L. D. Brooks, J. E. McEwen; International HapMap 3 Consortium, Integrating common and rare genetic variation in diverse human populations. *Nature* **467**, 52–58 (2010). [Medline](#) [doi:10.1038/nature09298](https://doi.org/10.1038/nature09298)
